# Supplementary material for: Single cell RNA-seq reveals that the Vibrio cholerae MakA toxin is required for killing of Tetrahymena pyriformis and for survival in protozoan expelled food vacuoles
Source: Research Square preprint supplement (doi:10.21203/rs.3.rs-3479672/v1), 2023-10-27
Supplement: Supplementary file 1 [file ced4bf8f1aeebcf216229409.xlsx]

## Sheet: Cluster0
	p_val	avg_log2FC	p_val_adj	cluster	gene
VC2766	1.4e-66	2.11726	5.08e-63	0	VC2766	F-type H+/Na+-transporting ATPase subunit alpha
VC2571	2.74e-103	1.94329	9.94e-100	0	VC2571	rpoA
VC0361	4.17e-53	1.86888	1.51e-49	0	VC0361	elongation factor G
VC2753	9.14e-55	1.82569	3.32e-51	0	VC2753	Hypothetical 46 aa peptide
VC0713	6.54e-213	1.80903	2.37e-209	0	VC0713	Hypothetical 65 aa peptide
VC2764	4.14e-35	1.41359	1.5e-31	0	VC2764	F-type H+/Na+-transporting ATPase subunit beta
secY	1.33e-63	1.37131	4.83e-60	0	secY	secY
VC2342	6.9e-86	1.31999	2.5e-82	0	VC2342	elongation factor G
VC0329	1.75e-43	1.20557	6.36e-40	0	VC0329	rpoB
VC0367	2.61e-30	1.17894	9.48e-27	0	VC0367	primosomal replication protein N
VCA0166	5.39e-38	1.07208	1.95e-34	0	VCA0166	CspA
aceE	6.84e-29	0.874205	2.48e-25	0	aceE	Pyruvate dehydrogenase E1
VC2573	2.82e-25	0.835791	1.02e-21	0	VC2573	ribosomal protein S11
VC2770	6.66e-19	0.780354	2.41e-15	0	VC2770	F-type H+-transporting ATPase subunit a
infC	3.8e-19	0.587609	1.38e-15	0	infC
VC0633	1.2e-27	0.580916	4.34e-24	0	VC0633	ompU
makB	1.55e-15	-0.904936	5.61e-12	0	makB	makB
glnA	2.84e-08	-0.956971	0.00010291	0	glnA	glnA
VC1362	1.26e-22	-1.13577	4.55e-19	0	VC1362	Aminoacid transporter
makA	3.86e-37	-1.23843	1.4e-33	0	makA	makA

## Sheet: Cluster1
	p_val	avg_log2FC	p_val_adj	cluster	gene
glnA.1	8.21e-11	-1.60987	2.98e-07	1	glnA
makB.1	8.9e-13	-1.43176	3.23e-09	1	makB
VC0713.1	1.63e-14	-1.08787	5.9e-11	1	VC0713
makA.1	1.06e-14	-1.22656	3.85e-11	1	makA
VC1362.1	4.82e-16	-1.69253	1.75e-12	1	VC1362

## Sheet: Cluster2
	p_val	avg_log2FC	p_val_adj	cluster	gene
VC1590	7.42e-15	1.66995	2.69e-11	2	VC1590	acetolactate synthase
makC	2.26e-18	1.60145	8.18e-15	2	makC	makC
VCA1097	6.87e-12	1.57487	2.49e-08	2	VCA1097	STAS hypothetical
VCA0865	1.07e-13	1.47412	3.89e-10	2	VCA0865	hapA
VC1362.2	2.43e-28	1.47302	8.81e-25	2	VC1362	Aminoacid transport
makB.2	4.75e-33	1.44934	1.72e-29	2	makB	makB
glnA.2	4.95e-20	1.41005	1.79e-16	2	glnA	glutamine synthase
VC2202	9.83e-10	1.28866	3.57e-06	2	VC2202	chemotaxis CheV2
makA.2	4.02e-32	1.25065	1.46e-28	2	makA	makA
VC1872	7.62e-08	1.21736	0.0002765	2	VC1872	serine protein kinase
VCA0268	1.74e-08	1.17171	6.3e-05	2	VCA0268	chemotaxis
secY.1	2.27e-11	-1.30402	8.24e-08	2	secY	secY
VC0329.1	2.53e-09	-1.40904	9.16e-06	2	VC0329	rpoB
VCA0166.1	1.61e-08	-1.46452	5.84e-05	2	VCA0166	cold shock protein
VC2342.1	2.28e-15	-1.59038	8.29e-12	2	VC2342	Elongation factor G
VC2571.1	1.76e-18	-5.20744	6.4e-15	2	VC2571	rpoA

## Sheet: Cluster3
	p_val	avg_log2FC	p_val_adj	cluster	gene
VC0533	6.79e-12	1.54597	2.46e-08	3	VC0533	lipoprotein NlpD - Intestinal colonization and bile resistance
VC1590.1	1.48e-16	1.4028	5.38e-13	3	VC1590	acetolactate synthase
makB.3	9e-36	1.37468	3.27e-32	3	makB	makB
VCA0268.1	5.02e-17	1.36966	1.82e-13	3	VCA0268	chemotaxis
glnA.3	2.16e-21	1.35467	7.85e-18	3	glnA	Glutamine synthase
VC1362.3	4.97e-31	1.2014	1.8e-27	3	VC1362	Aminoacid transport
makA.3	3.23e-34	1.1919	1.17e-30	3	makA	makA
VCA0865.1	5.1e-11	1.18428	1.85e-07	3	VCA0865	hapA
VC1872.1	7.9e-09	0.976591	2.87e-05	3	VC1872	serine protein kinase
makC.1	5.74e-07	0.860793	0.00208135	3	makC	makC
VC2342.2	7.32e-09	-0.715523	2.66e-05	3	VC2342	Elongation factor G
VC0329.2	1.88e-06	-0.773766	0.00681691	3	VC0329	rpoB
secY.2	7.72e-09	-1.09391	2.8e-05	3	secY	secY
VC0713.3	2.86e-31	-1.85759	1.04e-27	3	VC0713	Hypothetical 65 aa peptide
VC2571.2	6.18e-15	-2.86998	2.24e-11	3	VC2571	rpoA

## Sheet: Cluster4
	p_val	avg_log2FC	p_val_adj	cluster	gene
VC0713.4	4.16e-82	1.43915	1.51e-78	4	VC0713	Hypothetical 65 aa peptide
VC1362.4	7.53e-09	0.716763	2.73e-05	4	VC1362	Aminoacid Transport

## Sheet: Cluster5
	p_val	avg_log2FC	p_val_adj	cluster	gene
VC0329.3	1.56e-05	-1.17047	0.0564612	5	VC0329		rpoB
VC0633.3	4.4e-13	-1.71053	1.6e-09	5	VC0633		ompU
aceE.2	2.88e-07	-1.8985	0.0010435	5	aceE		Pyruvate dehydrogenase E1
secY.3	8.62e-11	-2.40162	3.13e-07	5	secY		secY
VC2342.3	9.22e-16	-2.48587	3.34e-12	5	VC2342		Elongation factor G
VC2571.3	5.32e-13	-5.16123	1.93e-09	5	VC2571		rpoA
VC0713.5	1.17e-43	-7.43308	4.26e-40	5	VC0713		Hypothetical 65 aa peptide

## Sheet: Cluster6
	p_val	avg_log2FC	p_val_adj	cluster	gene
makA.6	1.1e-06	0.549854	0.00398866	6	makA		makA
VC0329.4	1.32e-06	-1.4308	0.00477472	6	VC0329		rpoB
VC2342.4	8.31e-13	-1.85256	3.01e-09	6	VC2342		Elongation factor G
secY.4	1.72e-10	-2.23098	6.25e-07	6	secY		secY
VC2571.4	6.45e-12	-5.15195	2.34e-08	6	VC2571		rpoA
VC0713.6	1.02e-39	-7.42359	3.71e-36	6	VC0713		Hypothetical 65 aa peptide

## Sheet: Cluster7
	p_val	avg_log2FC	p_val_adj	cluster	gene
VC2187	0	7.27448	0	7	VC2187	flaC
VC2143	1.15e-264	6.43349	4.17e-261	7	VC2143	flaD
flhF	6.59e-200	6.07422	2.39e-196	7	flhF	flagellar biosynthesis F
flhA	4.4e-161	5.71181	1.59e-157	7	flhA	flagellar biosynthesis A

## Sheet: Cluster8
	p_val	avg_log2FC	p_val_adj	cluster	gene
secY.5	1.48e-06	0.479016	0.00538155	8	secY	secY
VC0647	2.29e-07	0.825144	0.000829989	8	VC0647	RNAse
VC2573.1	5.76e-08	0.652095	0.000208912	8	VC2573	ribosomal protein S11
VC0713.7	1.17e-08	0.496834	4.24e-05	8	VC0713	Hypothetical 65 aa peptide
VC2342.5	3.01e-10	0.713923	1.09e-06	8	VC2342	Elongation factor G
VC0361.2	2.87e-10	0.837581	1.04e-06	8	VC0361	Elongation factor G
infC.1	2.2e-11	1.28675	7.99e-08	8	infC
VC0747	7.36e-229	5.52304	2.67e-225	8	VC0747	iron-sulfur cluster assembly transcription factor - IscR
VC2251	2.02e-231	5.98432	7.32e-228	8	VC2251	ompH
VC0748	1.71e-304	5.66549	6.22e-301	8	VC0748	cysteine desulfurase
VC2252	0	6.18859	0	8	VC2252	outer membrane protein insertion porin family

## Sheet: Cluster9
	p_val	avg_log2FC	p_val_adj	cluster	gene
makA.8	7.13e-06	-1.37134	0.0258774	9	makA	makA
VC0633.6	4.44e-07	-1.88477	0.0016088	9	VC0633	ompU
VC1362.6	3.35e-06	-2.0982	0.0121458	9	VC1362	Aminoacid transport
glnA.7	1.54e-05	-2.41512	0.0559814	9	glnA	Glutamine synthase
VC2571.6	2.06e-07	-5.11298	0.000748737	9	VC2571	rpoA
VC0713.8	2.04e-23	-7.38372	7.4e-20	9	VC0713	Hypothetical 65 aa peptide

[truncated: 1 more sheets: Cluster10]
